# Supplementary material for: Skogbyite, Zr(Mg2Mn3+4)SiO12, a new zirconium mineral in the braunite group from Långban, Bergslagen, Sweden
Source: Copernicus journal article supplement (doi:10.5194/ejm-37-269-2025), 2025-04-23
Supplement: Supplementary file 1 [file ejm-37-269-2025-supplement.zip]

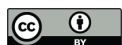

*Supplement of*

**Skogbyite,  $\text{Zr}(\text{Mg}_2\text{Mn}_4^{3+})\text{SiO}_{12}$ , a new zirconium mineral in the braunite group from Långban, Bergslagen, Sweden**

**Erik Jonsson et al.**

*Correspondence to:* Erik Jonsson ([erik.jonsson@sgu.se](mailto:erik.jonsson@sgu.se))

- [ejm-37-269-2025-supplement-title-page.pdf](#)
- [Skb.cif](#)

The copyright of individual parts of the supplement might differ from the article licence.
